# Supplementary material for: Fourier transform infrared spectroscopy to quantify collagen and elastin in an in vitro model of extracellular matrix degradation in aorta
Source: Royal Society of Chemistry journal article supplement (doi:10.1039/c3an02371k), 2014-01-01
Supplement: c3an02371k1.xlsx [file c3an02371k1.xlsx]

## Sheet: Pellets Spectra
	1800cm-1	1799cm-1	1798cm-1	1797cm-1	1796cm-1	1795cm-1	1794cm-1	1793cm-1	1792cm-1	1791cm-1	1790cm-1	1789cm-1	1788cm-1	1787cm-1	1786cm-1	1785cm-1	1784cm-1	1783cm-1	1782cm-1	1781cm-1	1780cm-1	1779cm-1	1778cm-1	1777cm-1	1776cm-1	1775cm-1	1774cm-1	1773cm-1	1772cm-1	1771cm-1	1770cm-1	1769cm-1	1768cm-1	1767cm-1	1766cm-1	1765cm-1	1764cm-1	1763cm-1	1762cm-1	1761cm-1	1760cm-1	1759cm-1	1758cm-1	1757cm-1	1756cm-1	1755cm-1	1754cm-1	1753cm-1	1752cm-1
Col	0.55063	0.553122	0.555317	0.557613	0.560185	0.562822	0.565362	0.567943	0.570678	0.57342	0.576076	0.578717	0.581328	0.583822	0.586297	0.588951	0.591722	0.594342	0.59687	0.599598	0.602519	0.605332	0.607949	0.610551	0.613178	0.615732	0.618383	0.621456	0.624691	0.627425	0.629628	0.631912	0.634666	0.63767	0.640589	0.643365	0.646074	0.648811	0.651713	0.654751	0.65773	0.660559	0.663518	0.666923	0.670443	0.67346	0.675934	0.678407	0.681327
Elas	0.553827	0.555471	0.557091	0.558828	0.560721	0.562641	0.564461	0.566177	0.567854	0.569557	0.571403	0.57346	0.575603	0.577644	0.579576	0.581551	0.583617	0.585685	0.587697	0.589731	0.591856	0.594029	0.596242	0.598509	0.600756	0.602872	0.604884	0.60701	0.609396	0.611908	0.614386	0.616808	0.619157	0.621462	0.623881	0.626519	0.62921	0.631714	0.634086	0.636594	0.639292	0.641994	0.644638	0.647347	0.650176	0.653006	0.655784	0.658581	0.661402
Col-Elas	0.554142	0.556109	0.557901	0.559754	0.561767	0.563842	0.565936	0.568103	0.570318	0.572484	0.574624	0.576836	0.579084	0.581257	0.5834	0.585656	0.588009	0.590314	0.592572	0.594925	0.597354	0.599706	0.601978	0.604259	0.60651	0.608683	0.610972	0.613594	0.61635	0.618847	0.621106	0.623487	0.62611	0.628756	0.631301	0.633857	0.636495	0.63915	0.641815	0.644547	0.647297	0.650009	0.652828	0.6559	0.658994	0.661738	0.664201	0.66683	0.669868
[truncated: 752 more columns]

## Sheet: FT-IRIS Spectra
	1800	1796	1792	1788	1784	1780	1776	1772	1768	1764	1760	1756	1752	1748	1744	1740	1736	1732	1728	1724	1720	1716	1712	1708	1704	1700	1696	1692	1688	1684	1680	1676	1672	1668	1664	1660	1656	1652	1648	1644	1640	1636	1632	1628	1624	1620	1616	1612	1608
Low	0.240557	0.239362	0.238506	0.237226	0.235484	0.233904	0.232597	0.231802	0.231145	0.230367	0.230716	0.232234	0.235259	0.241588	0.248413	0.252993	0.256256	0.258978	0.260165	0.26038	0.26239	0.271377	0.284019	0.298525	0.323357	0.368864	0.43239	0.478377	0.517073	0.583712	0.662605	0.722484	0.791128	0.8648	0.921526	0.961194	0.983146	0.993404	0.997744	0.995511	0.987965	0.971086	0.943858	0.902378	0.837311	0.764813	0.694516	0.636864	0.592975
High	0.182225	0.181266	0.179838	0.178096	0.176927	0.17603	0.175452	0.174376	0.172356	0.171201	0.170753	0.170888	0.172108	0.173986	0.175624	0.17703	0.177913	0.177283	0.176612	0.177715	0.181418	0.190525	0.20444	0.224326	0.258004	0.316762	0.399505	0.462004	0.511022	0.579691	0.650426	0.697463	0.745715	0.795219	0.832411	0.858796	0.874434	0.882989	0.887773	0.887935	0.884029	0.873468	0.858648	0.839457	0.807272	0.765308	0.71521	0.666098	0.621699
Med	0.188472	0.187751	0.18646	0.184685	0.183548	0.182833	0.182521	0.181823	0.180049	0.17912	0.179172	0.179979	0.182161	0.18548	0.18853	0.191146	0.193205	0.193584	0.193431	0.19498	0.19936	0.209204	0.223569	0.243849	0.277384	0.333989	0.411968	0.472179	0.52073	0.589008	0.66154	0.71262	0.765663	0.81975	0.860644	0.889705	0.906465	0.913743	0.915626	0.913023	0.906772	0.892428	0.872025	0.846322	0.805505	0.75529	0.69948	0.647403	0.602781
[truncated: 152 more columns]

## Sheet: IFOP Spectra
	1801.19	1797.33	1793.47	1789.62	1785.76	1781.9	1778.05	1774.19	1770.33	1766.47	1762.62	1758.76	1754.9	1751.05	1747.19	1743.33	1739.48	1735.62	1731.76	1727.91	1724.05	1720.19	1716.33	1712.48	1708.62	1704.76	1700.91	1697.05	1693.19	1689.34	1685.48	1681.62	1677.77	1673.91	1670.05	1666.19	1662.34	1658.48	1654.62	1650.77	1646.91	1643.05	1639.2	1635.34	1631.48	1627.63	1623.77	1619.91	1616.05
Low	0.094294	0.0955017	0.0962103	0.098349	0.099656	0.101824	0.103608	0.106139	0.10829	0.111541	0.113794	0.117284	0.119117	0.12293	0.127161	0.132259	0.136875	0.146066	0.15593	0.167674	0.17728	0.189172	0.204386	0.223261	0.238894	0.260353	0.286464	0.326846	0.363784	0.395741	0.431097	0.481509	0.52195	0.574877	0.639563	0.706741	0.766898	0.821918	0.863601	0.91106	0.937164	0.962585	0.975864	0.989649	0.987361	0.968885	0.924374	0.869293	0.805793
High	0.0920799	0.0925777	0.093158	0.0950451	0.0960318	0.0977962	0.0988534	0.100566	0.102071	0.104072	0.105041	0.106396	0.105773	0.106286	0.108113	0.113063	0.118887	0.12943	0.140159	0.150776	0.159101	0.169098	0.181482	0.196914	0.21108	0.230887	0.255171	0.293396	0.330454	0.364557	0.40372	0.455778	0.495904	0.543315	0.597253	0.653541	0.706716	0.75855	0.805204	0.865397	0.904413	0.936124	0.953167	0.969732	0.970236	0.956751	0.922546	0.879525	0.82618
Med	0.0815365	0.0825788	0.0833406	0.0850978	0.0858108	0.0873696	0.0888127	0.0912926	0.0931686	0.0959132	0.0987932	0.103815	0.108013	0.115209	0.122014	0.126471	0.128104	0.133143	0.138073	0.145101	0.150989	0.160064	0.172082	0.18771	0.201046	0.220875	0.245511	0.28508	0.322035	0.355085	0.392756	0.445841	0.485476	0.535189	0.594469	0.655718	0.712833	0.768692	0.815408	0.873991	0.907913	0.938696	0.953231	0.968599	0.969149	0.955016	0.916211	0.867949	0.807868
[truncated: 159 more columns]

## Sheet: Pellets 2nd Deriv
	1800cm-1	1799cm-1	1798cm-1	1797cm-1	1796cm-1	1795cm-1	1794cm-1	1793cm-1	1792cm-1	1791cm-1	1790cm-1	1789cm-1	1788cm-1	1787cm-1	1786cm-1	1785cm-1	1784cm-1	1783cm-1	1782cm-1	1781cm-1	1780cm-1	1779cm-1	1778cm-1	1777cm-1	1776cm-1	1775cm-1	1774cm-1	1773cm-1	1772cm-1	1771cm-1	1770cm-1	1769cm-1	1768cm-1	1767cm-1	1766cm-1	1765cm-1	1764cm-1	1763cm-1	1762cm-1	1761cm-1	1760cm-1	1759cm-1	1758cm-1	1757cm-1	1756cm-1	1755cm-1	1754cm-1	1753cm-1	1752cm-1
Col	0	0	0	0	0	0	0	0	0	0	0	0	0	0	0	0	0	0	0	0	0	7.73196e-06	8.02709e-06	8.69481e-06	9.56287e-06	1.01964e-05	1.04488e-05	1.063e-05	1.11372e-05	1.21105e-05	1.35037e-05	1.51766e-05	1.6839e-05	1.82886e-05	1.97116e-05	2.15118e-05	2.38257e-05	2.64069e-05	2.901e-05	3.16121e-05	3.40215e-05	3.57287e-05	3.63585e-05	3.60063e-05	3.51982e-05	3.4554e-05	3.4422e-05	3.48497e-05	3.55663e-05
Elas	0	0	0	0	0	0	0	0	0	0	0	0	0	0	0	0	0	0	0	0	0	2.35708e-05	2.36912e-05	2.39223e-05	2.42788e-05	2.46298e-05	2.48619e-05	2.49548e-05	2.49484e-05	2.50042e-05	2.53841e-05	2.61937e-05	2.72325e-05	2.82246e-05	2.91456e-05	3.0157e-05	3.13302e-05	3.26371e-05	3.40988e-05	3.57199e-05	3.7374e-05	3.89044e-05	4.02583e-05	4.14462e-05	4.24232e-05	4.32377e-05	4.41707e-05	4.55599e-05	4.75242e-05
Col-Elas	0	0	0	0	0	0	0	0	0	0	0	0	0	0	0	0	0	0	0	0	0	1.74119e-05	1.76718e-05	1.81144e-05	1.86067e-05	1.89316e-05	1.91343e-05	1.94777e-05	2.01063e-05	2.10034e-05	2.21776e-05	2.35926e-05	2.50353e-05	2.63202e-05	2.75416e-05	2.8914e-05	3.04623e-05	3.20853e-05	3.37989e-05	3.56224e-05	3.7268e-05	3.82799e-05	3.85174e-05	3.83156e-05	3.81698e-05	3.84054e-05	3.92086e-05	4.06497e-05	4.25082e-05
[truncated: 752 more columns]

## Sheet: FT-IRIS 2nd Deriv
IRI	1800	1796	1792	1788	1784	1780	1776	1772	1768	1764	1760	1756	1752	1748	1744	1740	1736	1732	1728	1724	1720	1716	1712	1708	1704	1700	1696	1692	1688	1684	1680	1676	1672	1668	1664	1660	1656	1652	1648	1644	1640	1636	1632	1628	1624	1620	1616	1612	1608
Low	0	0	0	0	3.91649e-05	0.000113162	0.000236736	0.000377625	0.000557396	0.000903704	0.00123862	0.00127545	0.000947149	0.000377611	-0.000270807	-0.000828101	-0.000972488	-0.00027501	0.000859542	0.00192759	0.00322629	0.00536035	0.00809861	0.00894126	0.007639	0.00673146	0.00629175	0.00467746	0.00365388	0.00383459	0.00300622	-0.00080744	-0.00575537	-0.00909319	-0.011181	-0.0126471	-0.0117067	-0.0095792	-0.0081788	-0.00803929	-0.00969915	-0.0116241	-0.0121703	-0.0102397	-0.00578671	-0.000264892	0.00500018	0.00859505	0.00973224
High	0	0	0	0	3.62967e-05	7.82707e-06	3.08501e-06	5.8817e-05	0.000237693	0.000463998	0.000611234	0.000578707	0.000366131	5.13229e-05	-0.000252173	-0.000344117	-8.40614e-05	0.000638651	0.00167277	0.00288135	0.00450238	0.0071194	0.0106839	0.0120611	0.0103158	0.00772887	0.00472517	0.000602694	-0.00243507	-0.00316485	-0.00320307	-0.00497081	-0.0071221	-0.00769161	-0.00778122	-0.00820865	-0.00745802	-0.00617495	-0.00531026	-0.0048665	-0.00530493	-0.00626917	-0.0072876	-0.00760263	-0.00666659	-0.00471462	-0.00174954	0.00158519	0.00423263
Med	0	0	0	0	7.5764e-05	5.63639e-05	5.61748e-05	0.00011658	0.000322454	0.000610329	0.000811174	0.000788194	0.000531036	0.000134207	-0.000277773	-0.000469509	-0.000247625	0.000504043	0.0015725	0.00280935	0.00442471	0.00689018	0.0101011	0.0113009	0.00969042	0.00743083	0.00494356	0.00145061	-0.00110662	-0.0017512	-0.00210604	-0.00429119	-0.00698821	-0.00824184	-0.00888624	-0.00955814	-0.00874565	-0.00727133	-0.00624196	-0.00569782	-0.0062201	-0.00732038	-0.00821708	-0.00798806	-0.00619751	-0.00342677	5.69401e-05	0.00350491	0.00582209
[truncated: 152 more columns]

## Sheet: IFOP 2nd deriv
	1801.19	1797.33	1793.47	1789.62	1785.76	1781.9	1778.05	1774.19	1770.33	1766.47	1762.62	1758.76	1754.9	1751.05	1747.19	1743.33	1739.48	1735.62	1731.76	1727.91	1724.05	1720.19	1716.33	1712.48	1708.62	1704.76	1700.91	1697.05	1693.19	1689.34	1685.48	1681.62	1677.77	1673.91	1670.05	1666.19	1662.34	1658.48	1654.62	1650.77	1646.91	1643.05	1639.2	1635.34	1631.48	1627.63	1623.77	1619.91	1616.05
Low	0	0	0	0	0	0.00019705	0.000201641	0.000143568	0.000154493	0.000170971	0.000244689	0.000294441	0.000492875	0.00073477	0.00102322	0.00113738	0.00119443	0.00122428	0.00138186	0.00138839	0.00146419	0.00168167	0.00248768	0.00321631	0.00348491	0.003344	0.00347	0.00325506	0.00314402	0.00330618	0.00382336	0.00415471	0.00410751	0.0027665	0.000940545	-0.00142785	-0.00353317	-0.00579306	-0.00691386	-0.00742437	-0.00797868	-0.00928772	-0.0108621	-0.0123377	-0.012797	-0.0122536	-0.0102154	-0.006956	-0.00286979
High	0	0	0	0	0	8.36574e-05	2.85969e-05	-7.84567e-05	-0.000138033	-0.000150275	1.43468e-05	0.000266354	0.00071739	0.00117936	0.0015265	0.00156479	0.00140709	0.00113091	0.000960486	0.000827782	0.000962711	0.00135006	0.0023373	0.00328169	0.00378529	0.00392844	0.00420373	0.00392748	0.00344807	0.00296261	0.00271773	0.00251887	0.00239486	0.00171467	0.00123208	0.000386039	-0.00074361	-0.00278644	-0.004489	-0.00609902	-0.00773947	-0.00963855	-0.0112279	-0.0122421	-0.0122884	-0.0119189	-0.010686	-0.00858825	-0.00545835
Med	0	0	0	0	0	0.000223165	0.000321055	0.000393281	0.000545866	0.000649358	0.0006375	0.00041727	0.000222859	2.80407e-05	-2.91288e-05	-2.73412e-05	0.000172039	0.000521212	0.00107768	0.00144283	0.00174107	0.00206075	0.00290415	0.00364878	0.00396856	0.00393581	0.00416695	0.00386107	0.0034603	0.00319029	0.00323437	0.00326176	0.00325779	0.00237287	0.00144027	-4.20404e-05	-0.0016039	-0.00395758	-0.00562727	-0.00689982	-0.00813414	-0.00978894	-0.0113054	-0.0125245	-0.0126664	-0.012127	-0.0104903	-0.0079466	-0.00449442
[truncated: 159 more columns]
